# Supplementary material for: Role of salivary and candidal proteins in denture stomatitis: an exploratory proteomic analysis
Source: Royal Society of Chemistry journal article supplement (doi:10.1039/c4mb00185k), 2014-06-11
Supplement: c4mb00185k4.xlsx [file c4mb00185k4.xlsx]

## Sheet: 1442_Stom_Orbi_Diff Express_pro
Protein Code	Protein Description	Higher Condition
O95201|ZN205_HUMAN	Zinc finger protein 205	Healthy
P01591|IGJ_HUMAN	Immunoglobulin J chain	Healthy
P04844|RPN2_HUMAN	Dolichyl-diphosphooligosaccharide--protein glycosyltransferase subunit 2	Healthy
P11217|PYGM_HUMAN	Glycogen phosphorylase, muscle form	Healthy
P21810|PGS1_HUMAN	Biglycan	Healthy
P25311|ZA2G_HUMAN	Zinc-alpha-2-glycoprotein	Healthy
P61626|LYSC_HUMAN	Lysozyme C	Healthy
Q14703|MBTP1_HUMAN	Membrane-bound transcription factor site-1 protease	Healthy
Q4AE62|GTDC1_HUMAN	Glycosyltransferase-like domain-containing protein 1	Healthy
Q5T481|RBM20_HUMAN	Probable RNA-binding protein 20	Healthy
Q8TAX7|MUC7_HUMAN	Mucin-7	Healthy
Q92738|US6NL_HUMAN	USP6 N-terminal-like protein	Healthy
Q96DA0|YP003_HUMAN	Uncharacterized protein UNQ773/PRO1567	Healthy
Q9ULZ9|MMP17_HUMAN	Matrix metalloproteinase-17	Healthy
Q9Y6F6|MRVI1_HUMAN	Protein MRVI1	Healthy
A0AVI2|FR1L5_HUMAN	Fer-1-like protein 5	Healthy, Stomatitis II
P01833|PIGR_HUMAN	Polymeric immunoglobulin receptor	Healthy, Stomatitis II
P02812|PRB2_HUMAN	Basic salivary proline-rich protein 2	Healthy, Stomatitis II
P04280|PRP1_HUMAN	Basic salivary proline-rich protein 1	Healthy, Stomatitis II
P06870|KLK1_HUMAN	Kallikrein-1	Healthy, Stomatitis II
P08123|CO1A2_HUMAN	Collagen alpha-2(I) chain	Healthy, Stomatitis II
P10163|PRB4_HUMAN	Basic salivary proline-rich protein 4	Healthy, Stomatitis II
P30291|WEE1_HUMAN	Wee1-like protein kinase	Healthy, Stomatitis II
P31025|LCN1_HUMAN	Lipocalin-1	Healthy, Stomatitis II
P42566|EPS15_HUMAN	Epidermal growth factor receptor substrate 15	Healthy, Stomatitis II
Q01668|CAC1D_HUMAN	Voltage-dependent L-type calcium channel subunit alpha-1D	Healthy, Stomatitis II
Q04118|PRB3_HUMAN	Basic salivary proline-rich protein 3	Healthy, Stomatitis II
Q16378|PROL4_HUMAN	Proline-rich protein 4	Healthy, Stomatitis II
Q6L8H4|KRA51_HUMAN	Keratin-associated protein 5-1	Healthy, Stomatitis II
Q8IWV7|UBR1_HUMAN	E3 ubiquitin-protein ligase UBR1	Healthy, Stomatitis II
Q8NG99|OR7G2_HUMAN	Olfactory receptor 7G2	Healthy, Stomatitis II
Q9H6B4|ACAM_HUMAN	Adipocyte adhesion molecule	Healthy, Stomatitis II
Q9UGM3|DMBT1_HUMAN	Deleted in malignant brain tumors 1 protein	Healthy, Stomatitis II
Q9Y285|SYFA_HUMAN	Phenylalanyl-tRNA synthetase alpha chain	Healthy, Stomatitis II
Q9Y5I4|PCDC2_HUMAN	Protocadherin alpha-C2	Healthy, Stomatitis II
Q9Y5S8|NOX1_HUMAN	NADPH oxidase 1	Healthy, Stomatitis II
Q9Y5Z7|HCFC2_HUMAN	Host cell factor 2	Healthy, Stomatitis II
SP|A5DXA0|NST1_LODEL	Stress response protein NST1	Healthy, Stomatitis II
SP|Q6FR76|UBC2_CANGA	Ubiquitin-conjugating enzyme E2 2	Healthy, Stomatitis II
SP|Q6FRZ5|SPT5_CANGA	Transcription elongation factor SPT5	Healthy, Stomatitis II
SP|Q6FTI0|TVP38_CANGA	Golgi apparatus membrane protein TVP38	Healthy, Stomatitis II
A8K2U0|A2ML1_HUMAN	Alpha-2-macroglobulin-like protein 1	Healthy, Stomatitis III
O43432|IF4G3_HUMAN	Eukaryotic translation initiation factor 4 gamma 3	Healthy, Stomatitis III
P00325|ADH1B_HUMAN	Alcohol dehydrogenase 1B	Healthy, Stomatitis III
P01842|LAC_HUMAN	Ig lambda chain C regions	Healthy, Stomatitis III
P01876|IGHA1_HUMAN	Ig alpha-1 chain C region	Healthy, Stomatitis III
P01877|IGHA2_HUMAN	Ig alpha-2 chain C region	Healthy, Stomatitis III
P04745|AMY1_HUMAN	Alpha-amylase 1	Healthy, Stomatitis III
P06331|HV209_HUMAN	Ig heavy chain V-II region ARH-77	Healthy, Stomatitis III
P11684|UTER_HUMAN	Uteroglobin	Healthy, Stomatitis III
P12273|PIP_HUMAN	Prolactin-inducible protein	Healthy, Stomatitis III
P23280|CAH6_HUMAN	Carbonic anhydrase 6	Healthy, Stomatitis III
P54108|CRIS3_HUMAN	Cysteine-rich secretory protein 3	Healthy, Stomatitis III
P61769|B2MG_HUMAN	Beta-2-microglobulin	Healthy, Stomatitis III
Q16799|RTN1_HUMAN	Reticulon-1	Healthy, Stomatitis III
Q5HYC2|K2026_HUMAN	Uncharacterized protein KIAA2026	Healthy, Stomatitis III
Q6P5S2|CF058_HUMAN	Uncharacterized protein C6orf58	Healthy, Stomatitis III
Q7Z7B1|PIGW_HUMAN	Phosphatidylinositol-glycan biosynthesis class W protein	Healthy, Stomatitis III
Q8NHY5|HUS1B_HUMAN	Checkpoint protein HUS1B	Healthy, Stomatitis III
Q8TAA5|GRPE2_HUMAN	GrpE protein homolog 2, mitochondrial	Healthy, Stomatitis III
Q96DR5|SPLC2_HUMAN	Short palate, lung and nasal epithelium carcinoma-associated protein 2	Healthy, Stomatitis III
Q96GE6|CALL4_HUMAN	Calmodulin-like protein 4	Healthy, Stomatitis III
Q9BTC0|DIDO1_HUMAN	Death-inducer obliterator 1	Healthy, Stomatitis III
SP|Q6FQY4|ENO2_CANGA,SP|Q70CP7|ENO_KLULA	Enolase	Healthy, Stomatitis III
SP|Q6FTV1|SWC4_CANGA	SWR1-complex protein 4	Healthy, Stomatitis III
O95450|ATS2_HUMAN	A disintegrin and metalloproteinase with thrombospondin motifs 2	Stomatitis II
P01242|SOM2_HUMAN	Growth hormone variant	Stomatitis II
P02810|PRPC_HUMAN	Salivary acidic proline-rich phosphoprotein 1/2	Stomatitis II
P02814|SMR3B_HUMAN	Submaxillary gland androgen-regulated protein 3B	Stomatitis II
P17600|SYN1_HUMAN	Synapsin-1	Stomatitis II
P24557|THAS_HUMAN	Thromboxane-A synthase	Stomatitis II
Q6NSI8|K1841_HUMAN	Uncharacterized protein KIAA1841	Stomatitis II
Q8IUZ5|AT2L2_HUMAN	Alanine--glyoxylate aminotransferase 2-like 2	Stomatitis II
Q8N4F0|BPIL1_HUMAN	Bactericidal/permeability-increasing protein-like 1	Stomatitis II
Q8NEG0|FA71C_HUMAN	Protein FAM71C	Stomatitis II
Q8WXF1|PSPC1_HUMAN	Paraspeckle component 1	Stomatitis II
Q8WXI7|MUC16_HUMAN	Mucin-16	Stomatitis II
Q99460|PSMD1_HUMAN	26S proteasome non-ATPase regulatory subunit 1	Stomatitis II
Q99798|ACON_HUMAN	Aconitate hydratase, mitochondrial	Stomatitis II
Q9UKR3|KLK13_HUMAN	Kallikrein-13	Stomatitis II
SP|Q6CJV1|DRS1_KLULA	ATP-dependent RNA helicase DRS1	Stomatitis II
O75128|COBL_HUMAN	Protein cordon-bleu	Stomatitis II, Stomatitis III
P01034|CYTC_HUMAN	Cystatin-C	Stomatitis II, Stomatitis III
P01871|IGHM_HUMAN	Ig mu chain C region	Stomatitis II, Stomatitis III
P02765|FETUA_HUMAN	Alpha-2-HS-glycoprotein	Stomatitis II, Stomatitis III
P04080|CYTB_HUMAN	Cystatin-B	Stomatitis II, Stomatitis III
P06702|S10A9_HUMAN	Protein S100-A9	Stomatitis II, Stomatitis III
P06744|G6PI_HUMAN	Glucose-6-phosphate isomerase	Stomatitis II, Stomatitis III
P10599|THIO_HUMAN	Thioredoxin	Stomatitis II, Stomatitis III
P13805|TNNT1_HUMAN	Troponin T, slow skeletal muscle	Stomatitis II, Stomatitis III
P22528|SPR1B_HUMAN	Cornifin-B	Stomatitis II, Stomatitis III
P35321|SPR1A_HUMAN	Cornifin-A	Stomatitis II, Stomatitis III
P35325|SPR2B_HUMAN,P22532|SPR2D_HUMAN	Small proline-rich protein 2B	Stomatitis II, Stomatitis III
P35326|SPR2A_HUMAN	Small proline-rich protein 2A	Stomatitis II, Stomatitis III
P50479|PDLI4_HUMAN	PDZ and LIM domain protein 4	Stomatitis II, Stomatitis III
P58062|ISK7_HUMAN	Serine protease inhibitor Kazal-type 7	Stomatitis II, Stomatitis III
P59666|DEF3_HUMAN,P59665|DEF1_HUMAN	Neutrophil defensin 3	Stomatitis II, Stomatitis III
P62333|PRS10_HUMAN	26S protease regulatory subunit S10B	Stomatitis II, Stomatitis III
P63261|ACTG_HUMAN,P60709|ACTB_HUMAN	Actin, cytoplasmic 1	Stomatitis II, Stomatitis III
P80188|NGAL_HUMAN	Neutrophil gelatinase-associated lipocalin	Stomatitis II, Stomatitis III
Q14508|WFDC2_HUMAN	WAP four-disulfide core domain protein 2	Stomatitis II, Stomatitis III
Q6IC07|RFL1S_HUMAN	Ret finger protein-like 1 antisense protein	Stomatitis II, Stomatitis III
Q8N1I6|CF214_HUMAN	Putative uncharacterized protein C6orf214	Stomatitis II, Stomatitis III
Q9UBC9|SPRR3_HUMAN	Small proline-rich protein 3	Stomatitis II, Stomatitis III
B2RTY4|MYO9A_HUMAN	Myosin-IXa	Stomatitis III
O15164|TIF1A_HUMAN	Transcription intermediary factor 1-alpha	Stomatitis III
O43173|SIA8C_HUMAN	Sia-alpha-2,3-Gal-beta-1,4-GlcNAc-R:alpha 2,8-sialyltransferase	Stomatitis III
O95359|TACC2_HUMAN	Transforming acidic coiled-coil-containing protein 2	Stomatitis III
P00338|LDHA_HUMAN	L-lactate dehydrogenase A chain	Stomatitis III
P00738|HPT_HUMAN	Haptoglobin	Stomatitis III
P01009|A1AT_HUMAN	Alpha-1-antitrypsin	Stomatitis III
P01011|AACT_HUMAN	Alpha-1-antichymotrypsin	Stomatitis III
P01023|A2MG_HUMAN	Alpha-2-macroglobulin	Stomatitis III
P01024|CO3_HUMAN	Complement C3	Stomatitis III
P01036|CYTS_HUMAN	Cystatin-S	Stomatitis III
P01037|CYTN_HUMAN	Cystatin-SN	Stomatitis III
P01743|HV102_HUMAN	Ig heavy chain V-I region HG3	Stomatitis III
P01764|HV303_HUMAN,P01765|HV304_HUMAN	Ig heavy chain V-III region TIL	Stomatitis III
P01769|HV308_HUMAN	Ig heavy chain V-III region GA	Stomatitis III
P01834|IGKC_HUMAN	Ig kappa chain C region	Stomatitis III
P01857|IGHG1_HUMAN	Ig gamma-1 chain C region	Stomatitis III
P01859|IGHG2_HUMAN	Ig gamma-2 chain C region	Stomatitis III
P01860|IGHG3_HUMAN	Ig gamma-3 chain C region	Stomatitis III
P02647|APOA1_HUMAN	Apolipoprotein A-I	Stomatitis III
P02652|APOA2_HUMAN	Apolipoprotein A-II	Stomatitis III
P02675|FIBB_HUMAN	Fibrinogen beta chain	Stomatitis III
P02679|FIBG_HUMAN	Fibrinogen gamma chain	Stomatitis III
P02763|A1AG1_HUMAN	Alpha-1-acid glycoprotein 1	Stomatitis III
P02768|ALBU_HUMAN	Serum albumin	Stomatitis III
P02774|VTDB_HUMAN	Vitamin D-binding protein	Stomatitis III
P02787|TRFE_HUMAN	Serotransferrin	Stomatitis III
P02788|TRFL_HUMAN	Lactotransferrin	Stomatitis III
P02790|HEMO_HUMAN	Hemopexin	Stomatitis III
P04075|ALDOA_HUMAN	Fructose-bisphosphate aldolase A	Stomatitis III
P04433|KV309_HUMAN	Ig kappa chain V-III region VG (Fragment)	Stomatitis III
P06396|GELS_HUMAN	Gelsolin	Stomatitis III
P06733|ENOA_HUMAN	Alpha-enolase	Stomatitis III
P09228|CYTT_HUMAN	Cystatin-SA	Stomatitis III
P18135|KV312_HUMAN,P18136|KV313_HUMAN,P01620|KV302_HUMAN,P01623|KV305_HUMAN	Ig kappa chain V-III region SIE	Stomatitis III
P22079|PERL_HUMAN	Lactoperoxidase	Stomatitis III
P24158|PRTN3_HUMAN	Myeloblastin	Stomatitis III
P28325|CYTD_HUMAN	Cystatin-D	Stomatitis III
P29376|LTK_HUMAN	Leukocyte tyrosine kinase receptor	Stomatitis III
P31947|1433S_HUMAN	14-3-3 protein sigma	Stomatitis III
P31949|S10AB_HUMAN	Protein S100-A11	Stomatitis III
P68871|HBB_HUMAN	Hemoglobin subunit beta	Stomatitis III
P69905|HBA_HUMAN	Hemoglobin subunit alpha	Stomatitis III
P80748|LV302_HUMAN	Ig lambda chain V-III region LOI	Stomatitis III
Q01469|FABP5_HUMAN	Fatty acid-binding protein, epidermal	Stomatitis III
Q08170|SFRS4_HUMAN	Splicing factor, arginine/serine-rich 4	Stomatitis III
Q0VDD8|DYH14_HUMAN	Dynein heavy chain 14, axonemal	Stomatitis III
Q14232|EI2BA_HUMAN	Translation initiation factor eIF-2B subunit alpha	Stomatitis III
Q15878|CAC1E_HUMAN	Voltage-dependent R-type calcium channel subunit alpha-1E	Stomatitis III
Q2KJY2|KI26B_HUMAN	Kinesin-like protein KIF26B	Stomatitis III
Q5JRM2|YX016_HUMAN	Uncharacterized protein LOC347487	Stomatitis III
Q676U5|A16L1_HUMAN	Autophagy-related protein 16-1	Stomatitis III
Q68CP9|ARID2_HUMAN	AT-rich interactive domain-containing protein 2	Stomatitis III
Q6PML9|ZNT9_HUMAN	Zinc transporter 9	Stomatitis III
Q6ZMZ0|RN19B_HUMAN	E3 ubiquitin-protein ligase RNF19B	Stomatitis III
Q7RTM1|OTOP1_HUMAN	Otopetrin-1	Stomatitis III
Q8IVS8|GLCTK_HUMAN	Glycerate kinase	Stomatitis III
Q8IVU3|HERC6_HUMAN	Probable E3 ubiquitin-protein ligase HERC6	Stomatitis III
Q8IVW4|CDKL3_HUMAN	Cyclin-dependent kinase-like 3	Stomatitis III
Q8WXE0|CSKI2_HUMAN	Caskin-2	Stomatitis III
Q8WXH2|JPH3_HUMAN	Junctophilin-3	Stomatitis III
Q99758|ABCA3_HUMAN	ATP-binding cassette sub-family A member 3	Stomatitis III
Q9BX84|TRPM6_HUMAN	Transient receptor potential cation channel subfamily M member 6	Stomatitis III
Q9C040|TRIM2_HUMAN	Tripartite motif-containing protein 2	Stomatitis III
Q9HC84|MUC5B_HUMAN	Mucin-5B	Stomatitis III
Q9HCJ1|ANKH_HUMAN	Progressive ankylosis protein homolog	Stomatitis III
Q9UHY1|NRBP_HUMAN	Nuclear receptor-binding protein	Stomatitis III
Q9Y3Y4|PYGO1_HUMAN	Pygopus homolog 1	Stomatitis III
SP|P53705|BUD4_CANAL	Bud site selection protein BUD4	Stomatitis III
SP|Q6CUD9|UBC2_KLULA	Ubiquitin-conjugating enzyme E2 2	Stomatitis III
SP|Q6CVE9|MYO1_KLULA	Myosin-1	Stomatitis III
SP|Q6FRE7|PTK2_CANGA	Serine/threonine-protein kinase PTK2	Stomatitis III
