# Supplementary material for: Role of salivary and candidal proteins in denture stomatitis: an exploratory proteomic analysis
Source: Royal Society of Chemistry journal article supplement (doi:10.1039/c4mb00185k), 2014-06-11
Supplement: c4mb00185k5.xlsx [file c4mb00185k5.xlsx]

## Sheet: 1581_Saliva_Synapti_Diff Expres
Protein Code	Protein Description	Higher Condition
O95983|MBD3_HUMAN	Methyl-CpG-binding domain protein 3	Healthy
P01591|IGJ_HUMAN	Immunoglobulin J chain	Healthy
P11684|UTER_HUMAN	Uteroglobin	Healthy
P18510|IL1RA_HUMAN	Interleukin-1 receptor antagonist protein	Healthy
P19961|AMY2B_HUMAN	Alpha-amylase 2B	Healthy
P22079|PERL_HUMAN	Lactoperoxidase	Healthy
P23280|CAH6_HUMAN	Carbonic anhydrase 6	Healthy
P29474|NOS3_HUMAN	Nitric oxide synthase, endothelial	Healthy
P35573|GDE_HUMAN	Glycogen debranching enzyme	Healthy
P61626|LYSC_HUMAN	Lysozyme C	Healthy
P61769|B2MG_HUMAN	Beta-2-microglobulin	Healthy
Q6ZNG2|DBX2_HUMAN	Homeobox protein DBX2	Healthy
Q8NB25|F184A_HUMAN	Protein FAM184A	Healthy
Q8TDL5|LPLC1_HUMAN	Long palate, lung and nasal epithelium carcinoma-associated protein 1	Healthy
Q907|POK7_HUMAN	HERV-K_1q23.3 provirus ancestral Pol protein	Healthy
Q96DA0|YP003_HUMAN	Uncharacterized protein UNQ773/PRO1567	Healthy
Q96DR5|SPLC2_HUMAN	Short palate, lung and nasal epithelium carcinoma-associated protein 2	Healthy
Q96Q06|K1881_HUMAN	Protein KIAA1881	Healthy
Q9NP55|PLUNC_HUMAN	Protein Plunc	Healthy
Q9UBG3|CRNN_HUMAN	Cornulin	Healthy
SP|A5DAD0|PAN2_PICGU	PAB-dependent poly(A)-specific ribonuclease subunit PAN2	Healthy
SP|O13318|PHR2_CANAL	pH-responsive protein 2	Healthy
SP|Q6C7Q0|PFA4_YARLI	Palmitoyltransferase PFA4	Healthy
A8K2U0|A2ML1_HUMAN	Alpha-2-macroglobulin-like protein 1	Healthy, Stomatitis II
P01036|CYTS_HUMAN	Cystatin-S	Healthy, Stomatitis II
P01624|KV306_HUMAN	Ig kappa chain V-III region POM	Healthy, Stomatitis II
P01833|PIGR_HUMAN	Polymeric immunoglobulin receptor	Healthy, Stomatitis II
P01876|IGHA1_HUMAN	Ig alpha-1 chain C region	Healthy, Stomatitis II
P04746|AMYP_HUMAN	Pancreatic alpha-amylase	Healthy, Stomatitis II
P25311|ZA2G_HUMAN	Zinc-alpha-2-glycoprotein	Healthy, Stomatitis II
P31025|LCN1_HUMAN	Lipocalin-1	Healthy, Stomatitis II
Q9UBC9|SPRR3_HUMAN	Small proline-rich protein 3	Healthy, Stomatitis II
Q9Y3L3|3BP1_HUMAN	SH3 domain-binding protein 1	Healthy, Stomatitis II
P04745|AMY1_HUMAN	Alpha-amylase 1	Healthy, Stomatitis III
O94885|SASH1_HUMAN	SAM and SH3 domain-containing protein 1	Stomatitis II
P02814|SMR3B_HUMAN	Submaxillary gland androgen-regulated protein 3B	Stomatitis II
P06870|KLK1_HUMAN	Kallikrein-1	Stomatitis II
P10599|THIO_HUMAN	Thioredoxin	Stomatitis II
P55197|AF10_HUMAN	Protein AF-10	Stomatitis II
P62937|PPIA_HUMAN	Peptidyl-prolyl cis-trans isomerase A	Stomatitis II
P80188|NGAL_HUMAN	Neutrophil gelatinase-associated lipocalin	Stomatitis II
Q12864|CAD17_HUMAN	Cadherin-17	Stomatitis II
Q9HCJ0|TNR6C_HUMAN	Trinucleotide repeat-containing gene 6C protein	Stomatitis II
SP|Q5AG31|MED14_CANAL	Mediator of RNA polymerase II transcription subunit 14	Stomatitis II
SP|Q6FRY5|SLU7_CANGA	Pre-mRNA-splicing factor SLU7	Stomatitis II
P00738|HPT_HUMAN	Haptoglobin	Stomatitis II, Stomatitis III
P01009|A1AT_HUMAN	Alpha-1-antitrypsin	Stomatitis II, Stomatitis III
P01023|A2MG_HUMAN	Alpha-2-macroglobulin	Stomatitis II, Stomatitis III
P01024|CO3_HUMAN	Complement C3	Stomatitis II, Stomatitis III
P01037|CYTN_HUMAN	Cystatin-SN	Stomatitis II, Stomatitis III
P01842|LAC_HUMAN	Ig lambda chain C regions	Stomatitis II, Stomatitis III
P01857|IGHG1_HUMAN	Ig gamma-1 chain C region	Stomatitis II, Stomatitis III
P01859|IGHG2_HUMAN	Ig gamma-2 chain C region	Stomatitis II, Stomatitis III
P01861|IGHG4_HUMAN	Ig gamma-4 chain C region	Stomatitis II, Stomatitis III
P01877|IGHA2_HUMAN	Ig alpha-2 chain C region	Stomatitis II, Stomatitis III
P02749|APOH_HUMAN	Beta-2-glycoprotein 1	Stomatitis II, Stomatitis III
P02763|A1AG1_HUMAN	Alpha-1-acid glycoprotein 1	Stomatitis II, Stomatitis III
P02788|TRFL_HUMAN	Lactotransferrin	Stomatitis II, Stomatitis III
P02790|HEMO_HUMAN	Hemopexin	Stomatitis II, Stomatitis III
P09228|CYTT_HUMAN	Cystatin-SA	Stomatitis II, Stomatitis III
P12273|PIP_HUMAN	Prolactin-inducible protein	Stomatitis II, Stomatitis III
P19652|A1AG2_HUMAN	Alpha-1-acid glycoprotein 2	Stomatitis II, Stomatitis III
P28325|CYTD_HUMAN	Cystatin-D	Stomatitis II, Stomatitis III
P63261|ACTG_HUMAN,P60709|ACTB_HUMAN	Actin, cytoplasmic 1	Stomatitis II, Stomatitis III
P68871|HBB_HUMAN	Hemoglobin subunit beta	Stomatitis II, Stomatitis III
P69905|HBA_HUMAN	Hemoglobin subunit alpha	Stomatitis II, Stomatitis III
P78424|PO6F2_HUMAN	POU domain, class 6, transcription factor 2	Stomatitis II, Stomatitis III
Q01469|FABP5_HUMAN	Fatty acid-binding protein, epidermal	Stomatitis II, Stomatitis III
Q6S8J3|A26CA_HUMAN	ANKRD26-like family C member 1A	Stomatitis II, Stomatitis III
Q8N4F0|BPIL1_HUMAN	Bactericidal/permeability-increasing protein-like 1	Stomatitis II, Stomatitis III
Q96J94|PIWL1_HUMAN	Piwi-like protein 1	Stomatitis II, Stomatitis III
Q9UNN5|FAF1_HUMAN	FAS-associated factor 1	Stomatitis II, Stomatitis III
SP|P06598|ACOX4_CANTR	Acyl-coenzyme A oxidase 4	Stomatitis II, Stomatitis III
O60336|MABP1_HUMAN	Mitogen-activated protein kinase-binding protein 1	Stomatitis III
P00450|CERU_HUMAN	Ceruloplasmin	Stomatitis III
P01834|IGKC_HUMAN	Ig kappa chain C region	Stomatitis III
P01860|IGHG3_HUMAN	Ig gamma-3 chain C region	Stomatitis III
P02042|HBD_HUMAN	Hemoglobin subunit delta	Stomatitis III
P02647|APOA1_HUMAN	Apolipoprotein A-I	Stomatitis III
P02768|ALBU_HUMAN	Serum albumin	Stomatitis III
P02774|VTDB_HUMAN	Vitamin D-binding protein	Stomatitis III
P02787|TRFE_HUMAN	Serotransferrin	Stomatitis III
P04080|CYTB_HUMAN	Cystatin-B	Stomatitis III
P04217|A1BG_HUMAN	Alpha-1B-glycoprotein	Stomatitis III
P05109|S10A8_HUMAN	Protein S100-A8	Stomatitis III
P11177|ODPB_HUMAN	Pyruvate dehydrogenase E1 component subunit beta, mitochondrial	Stomatitis III
P12883|MYH7_HUMAN	Myosin-7	Stomatitis III
P21675|TAF1_HUMAN	Transcription initiation factor TFIID subunit 1	Stomatitis III
P63104|1433Z_HUMAN	14-3-3 protein zeta/delta	Stomatitis III
P78386|KRT85_HUMAN,Q14533|KRT81_HUMAN,P78385|KRT83_HUMAN,O43790|KRT86_HUMAN	Keratin, type II cuticular Hb3	Stomatitis III
Q13474|DRP2_HUMAN	Dystrophin-related protein 2	Stomatitis III
Q96QT4|TRPM7_HUMAN	Transient receptor potential cation channel subfamily M member 7	Stomatitis III
Q9P2T1|GMPR2_HUMAN	GMP reductase 2	Stomatitis III
Q9Y2I7|FYV1_HUMAN	FYVE finger-containing phosphoinositide kinase	Stomatitis III
SP|A5DKH0|MYO1_PICGU	Myosin-1	Stomatitis III
SP|Q6CA87|SWR1_YARLI	Helicase SWR1	Stomatitis III
SP|Q6FV72|CG121_CANGA	Protein CGI121	Stomatitis III
